# Supplementary material for: Optimal Surveillance of Intraductal Papillary Mucinous Neoplasms of the Pancreas Focusing on Remnant Pancreas Recurrence After Surgical Resection
Source: Research Square preprint supplement (doi:10.21203/rs.3.rs-1123860/v1), 2021-12-15
Supplement: Supplementary file 2 [file 9e6ef449100bb38ab921e89c.xlsx]

## Sheet: Sheet1
Table 2. Univariate and multivariate analyses to examine risk factors for remnant pancreatic recurrence
Variables		Number	Univariate analysis			Multivariate analysis
			Hazard ratio	95% CI	p-value	Hazard ratio	95% CI	p-value
Background factor
Age (y)	≥65 vs <65	68 vs 23	1.05	0.40-3.27	0.919	-	-	-
Sex	Male vs Female	57 vs 34	0.51	0.20-1.26	0.144	-	-	-
Preoperative factor
Location of IPMN	pancreas head vs pancreas body/tail	57 vs 34	0.48	0.19-1.19	0.114	-	-	-
Multifocal IPMN	vs single lesion	23 vs 67	1.8	0.66-4.56	0.239	-	-	-
Obstructive jaundice	present vs absent	5 vs 86	4.15	0.22-24.39	0.266	-	-	-
Enhancing solid component on CT	present vs absent	25 vs 66	1.88	0.66-4.83	0.225	-	-	-
Main pancreatic duct (mm)	≥ 10 vs <10	16 vs 75	0.82	0.19-2.46	0.743	-	-	-
Size of BD-IPMN (mm)	≥ 30 vs < 30	36 vs 39	0.51	0.14-1.57	0.247	-	-	-
Definite mural nodule on EUS	present vs absent	51 vs 35	1.21	0.49-3.26	0.682	-	-	-
MPD stenosis or disruption	present vs absent	17 vs 69	8.03	2.92-21.54	<.001	10.63	2.40-45.48	0.002
Pancreatic fluid cytology	class4-5 vs 1-3	17 vs 61	4.2	1.52-10.87	0.007	0.36	0.08-1.56	0.169
CEA (ng/ml)	elevated vs not elevated	24 vs 67	0.48	0.11-1.45	0.211	-	-	-
CA19-9 (U/ml)	elevated vs not elevated	24 vs 67	1.62	0.52-4.27	0.38	-	-	-
Operative factor
Operative procedure	pancreatoduodenectomy vs distal/middle pancreatectomy	57 vs 34	0.58	0.23-1.45	0.243	-	-	-
Surgical margin	IPMC/HGD vs negative/LGD	9 vs 82	7	2.48-18.27	<.001	4.4	1.31-14.60	0.018
Pathological classification	IPMC vs LGD	30 vs 42	9.05	3.00-33.42	<.001	2.39	0.57-10.82	0.235
	HGD vs LGD	19 vs 42	2.18	0.51-9.22	0.28	2.18	0.47-9.94	0.308
	IPMC vs HGD	30 vs 19	4.15	1.36-15.46	0.011	1.09	0.31-4.49	0.891
Abbreviations: CA19-9, carbohydrate antigen 19-9; CEA, carcinoembryonic antigen; HGD, high-grade dysplasia (non-invasive IPMN); IPMC, IPMN with an associated invasive carcinoma; LGD, low-grade and intermediate-grade dysplasia
