# Supplementary material for: Optimal Surveillance of Intraductal Papillary Mucinous Neoplasms of the Pancreas Focusing on Remnant Pancreas Recurrence After Surgical Resection
Source: Research Square preprint supplement (doi:10.21203/rs.3.rs-1123860/v1), 2021-12-15
Supplement: Supplementary file 3 [file 3739e15a6f819ff0c37eacac.xlsx]

## Sheet: Sheet1
Table 1. Summary of clinicopathological characteristics and correlations between recurrence patterns
	All	No recurrence	Rem-Panc	Ex-panc	p value*
	N=91	N=65	N=19	N=7
Age
y, mean (range)	68.9 (39-88)	69.1 (53-88)	69.2 (57-82)	65.0 (39-77)	0.41
Sex
Female, n (%)	34 (37.4)	20 (30.8)	10 (52.6)	4 (57.1)	0.12
Male, n (%)	57 (62.6)	45 (69.2)	9 (47.4)	3 (42.9)
Location of IPMN
Head of the pancreas, n (%)	57 (62.6)	43 (66.2)	8 (42.1)	6 (85.7)	0.07
Pancreas body and tail, n (%)	34 (37.4)	22 (33.9)	11 (57.9)	1 (14.3)
MPD diameter
mm, median (range)	5.5 (0.8-20)	5.5 (1-15)	5.2 (0.8-20)	6.0 (2.4-11)	0.93
Size of cyst
mm, median (range)	29 (3-120)	30 (3-120)	24 (3-53)	33 (15-50)	0.62
Multifocal IPMN
yes, n (%)	23 (25.6)	15 (23.1)	7 (38.9)	1 (14.3)	0.31
Clinical symptom
Jaundice, n (%)	5 (5.5)	0 (0)	1 (5.3)	4 (57.1)	<0.001
Pancreatitis, n (%)	9 (9.9)	8 (12.3)	1 (5.3)	0 (0)
None, n (%)	77 (84.6)	57 (87.7)	17 (89.5)	3 (42.9)
Enhancing solid component at CT
Yes, n (%)	25 (27.5)	14 (21.5)	6 (31.6)	5 (71.4)	0.02
Definite mural nodule at EUS
Yes, n (%)	51 (59.3)	34 (55.7)	12 (63.2)	5 (83.3)	0.39
MPD stenosis or disruption
Yes, n (%)	17 (19.8)	6 (9.8)	8 (44.4)	3 (42.9)	0.002
Pancreatic fluid cytology
Class 1, n (%)	1 (1.3)	0 (0)	1 (5.6)	0 (0)	<0.001
Class 2, n (%)	32 (41.0)	27 (50.9)	5 (27.8)	0 (0)
Class 3, n (%)	28 (35.9)	21 (39.6)	5 (27.8)	2 (28.6)
Class 4, n (%)	3 (3.9)	2 (3.8)	0 (0)	1 (14.3)
Class 5, n (%)	14 (20.0)	3 (5.7)	7 (38.9)	4 (57.1)
serum CEA
ng/ml, median (range)	2.6 (0.3-31.4)	2.6 (0.3-12.4)	2.4 (1.0-31.4)	2.9 (2.2-31.1)	0.34
Serum CA19-9
U/ml, median (range)	16.8 (0.6-23220)	13.8 (0.6-401)	18.8 (2.0-541)	151 (80.3-23220)	<0.001
Operative procedure
Pancreatoduodenectomy, n (%)	57 (62.6)	42 (64.6)	9 (47.4)	6 (85.7)	0.14
Middle pancreatectomy, n (%)	5 (5.5)	2 (3.1)	3 (15.8)	0 (0)
Distal pancreatectomy, n (%)	29 (31.9)	21 (32.3)	7 (36.8)	1 (14.3)
Pathology
LGD, n (%)	42 (46.2)	38 (58.5)	4 (21.1)	0 (0)	<0.001
HGD, n (%)	19 (20.9)	15 (23.1)	4 (21.1)	0 (0)
IPMC, n (%)	30 (33.0)	12 (18.5)	11 (57.9)	7 (100)
Surgical margin
Negative, n (%)	60 (65.9)	47 (72.3)	9 (47.4)	4 (57.1)	0.005
LGD, n (%)	22 (24.2)	17 (26.2)	4 (21.1)	1 (14.3)
HGD, n (%)	6 (6.6)	1 (1.5)	4 (21.1)	1 (14.3)
IPMC, n (%)	3 (3.3)	0 (0)	2 (10.5)	1 (14.3)
T factor of HGD/IPMC
Tis, n (%)	19 (38.8)	15 (55.6)	4 (26.7)	0 (0)	0.02
T1, n (%)	5 (10.2)	2 (7.4)	3 (20.0)	0 (0)
T2, n (%)	2 (4.1)	2 (7.4)	0 (0)	0 (0)
T3, n (%)	23 (46.9)	8 (29.6)	8 (53.3)	7 (100)
Lymph node metastasis of IPMC
Yes, n (%)	12 (25.0)	4 (15.4)	3 (20.0)	5 (71.4)	0.009
Adjuvant chemotherapy for IPMC
Yes, n (%)	20 (42.6)	6 (24.0)	8 (53.3)	6 (85.7)	0.008
Abbreviations: CA19-9, carbohydrate antigen 19-9; CEA, carcinoembryonic antigen; HGD, high-grade dysplasia (non-invasive IPMN); IPMC, IPMN with an associated invasive carcinoma; LGD, low-grade and intermediate-grade dysplasia
* Comparison between Rem-Panc and Ex-Panc recurrence
†† IPMN spread to multiple segments
